# Supplementary material for: Identification of the tri-Al tricitrate complex in Plantago almogravensis by hydrophilic interaction LC with parallel ICP-MS and electrospray Orbitrap MS/MS detection
Source: Royal Society of Chemistry journal article supplement (doi:10.1039/c3mt00101f), 2013-01-01
Supplement: c3mt00101f.pdf [file c3mt00101f.pdf]

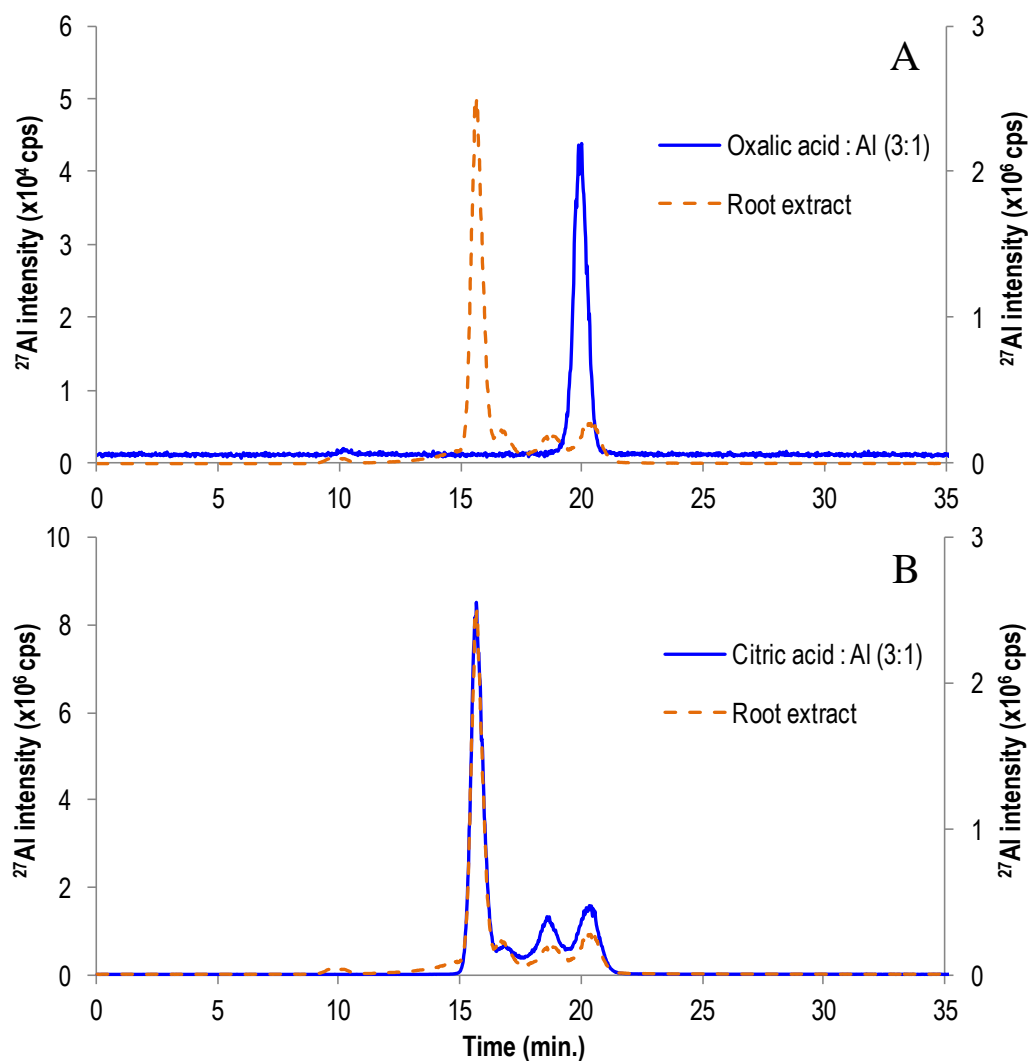

**Figure S1.** SEC-ICP-MS chromatograms of Al-oxalic acid (A) and -citric acid (B) standard solutions (3:1 organic acid to Al ratio, buffered at pH 6.0). The chromatogram obtained for a root sample (signal intensity on right axis) is also depicted to compare the elution times of Al-complexes in standard solutions with those detected in *P. almogravensis*.

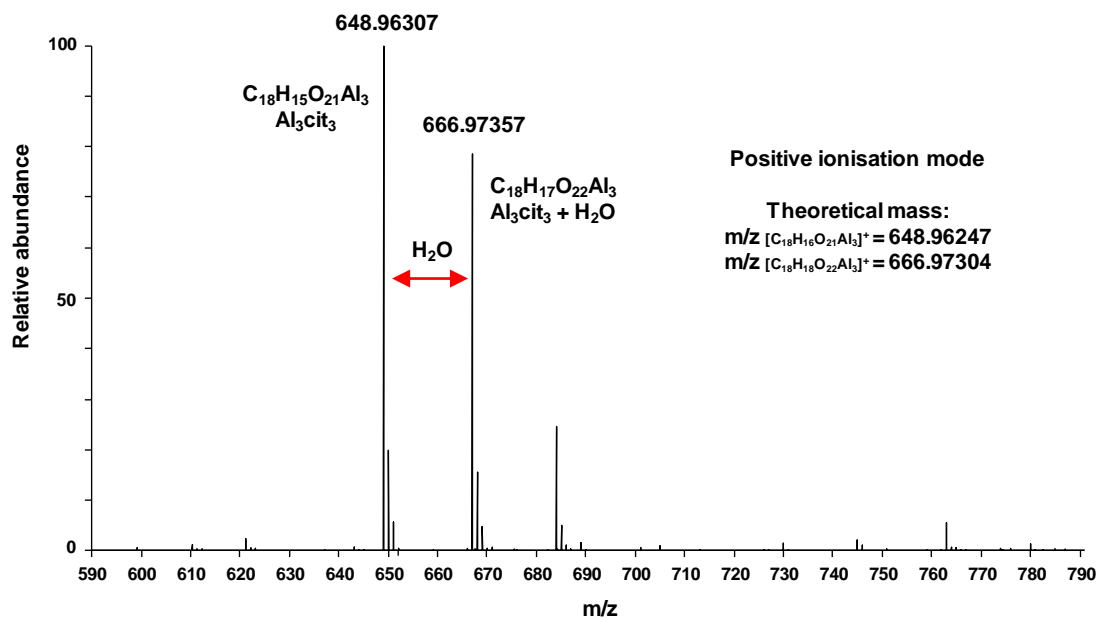

Figure S2. Electrospray mass spectrum obtained for standard solution of  $Al^{3+}$  and citric acid (metal:ligand ratio - 1:4).

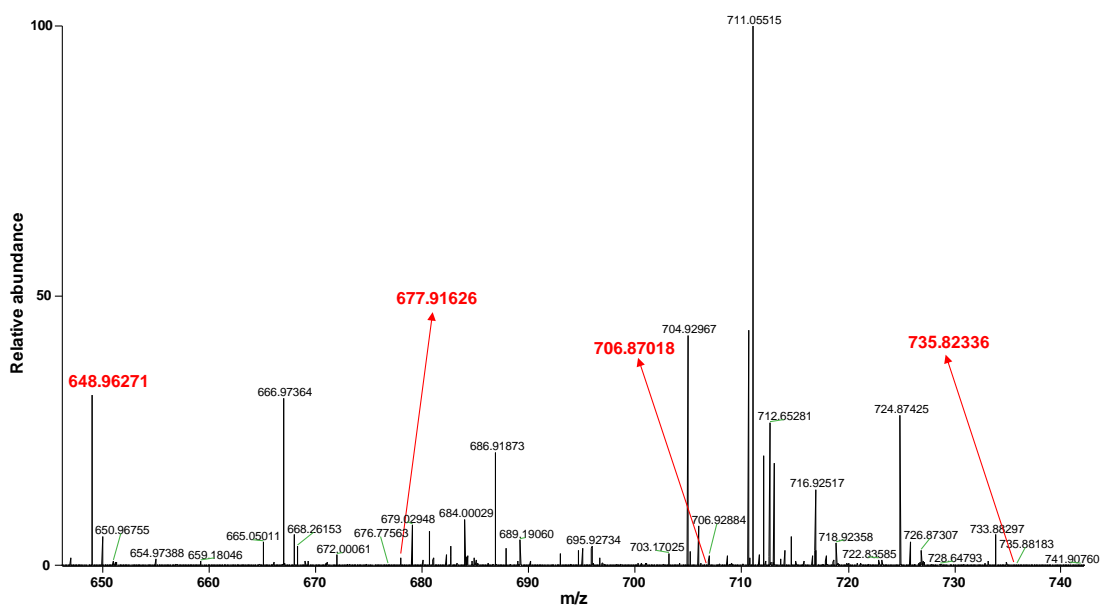

Figure S3. Starting from the molecular ion corresponding to  $Al_3cit_3$  ( $m/z$  648.9627) successive addition of the mass difference between Fe and Al ( $\Delta$  28.95 u) allows observing the ions corresponding to  $Al_2FeCit_3$  ( $m/z$  677.9163),  $AlFe_2Cit_3$  ( $m/z$  706.8702) and  $Fe_3Cit_3$  ( $m/z$  735.8234).

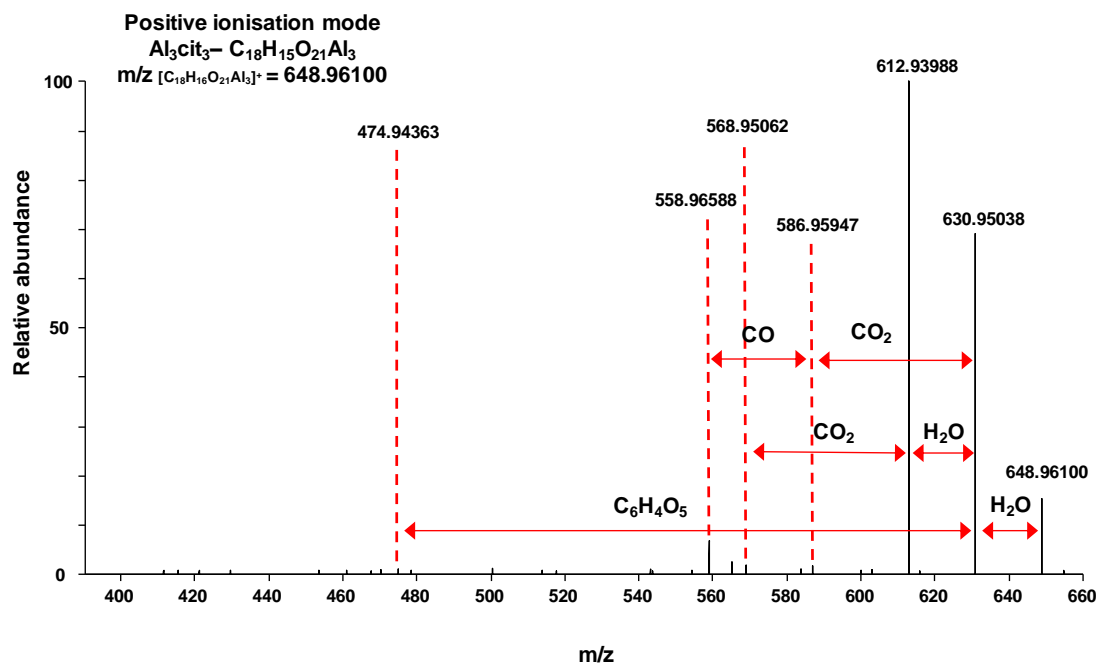

Figure S4. CID-MS spectrum of the  $m/z$  648.96100 ion.
